# Supplementary material
Source: PubMed Central journal article supplement (PMC2719674)

Supplemental Figure 1

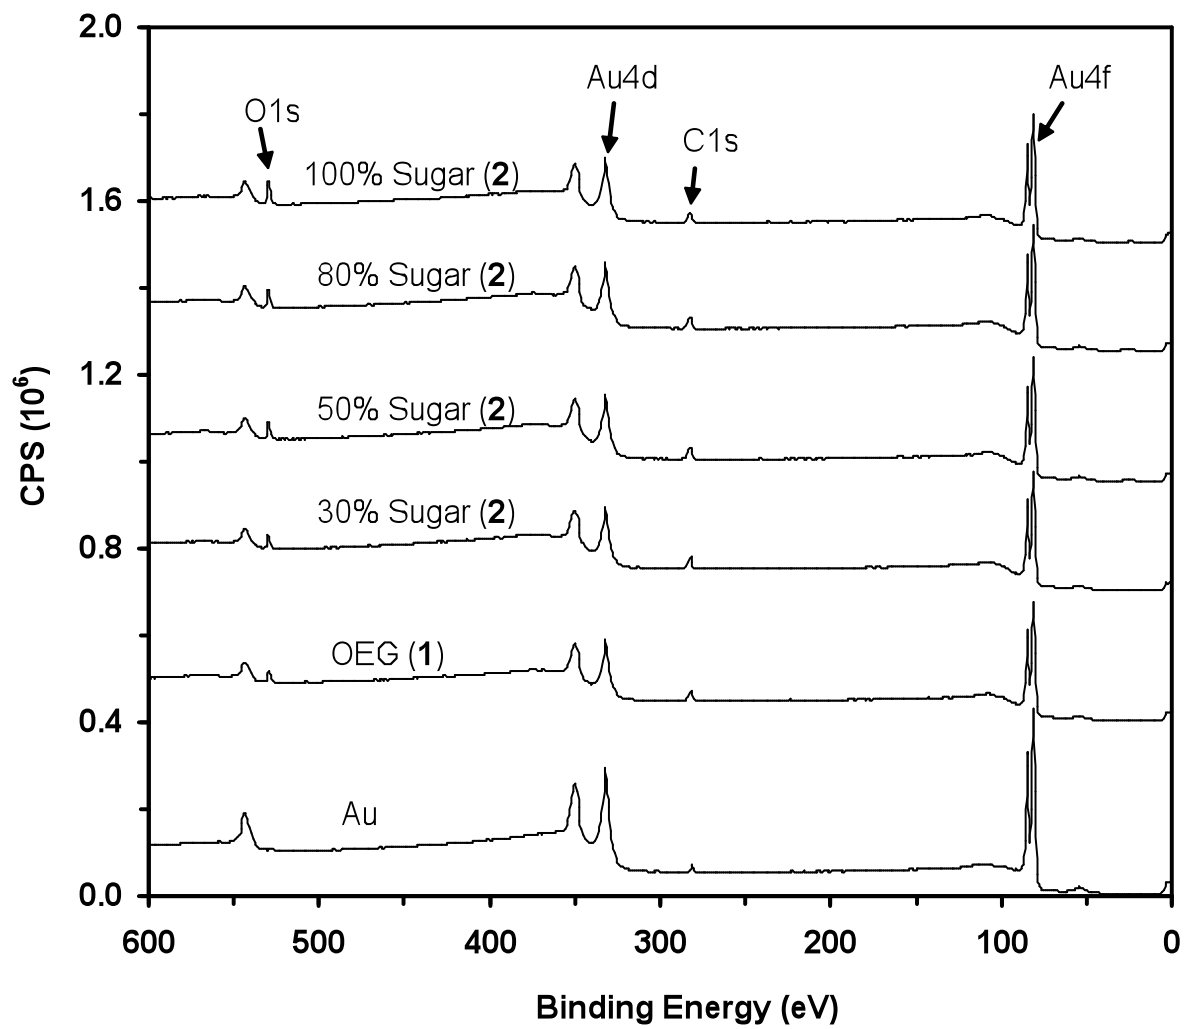

## Supplemental Figure 2

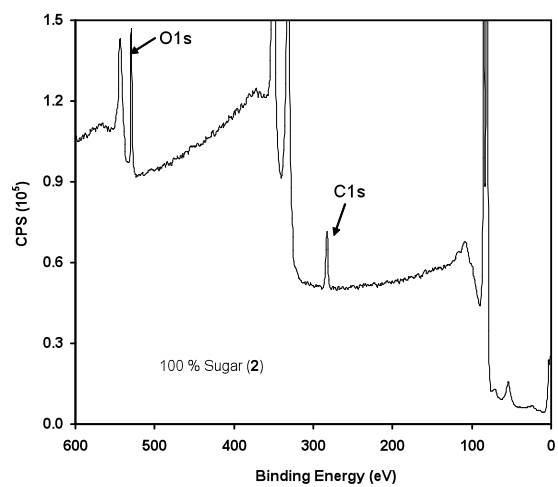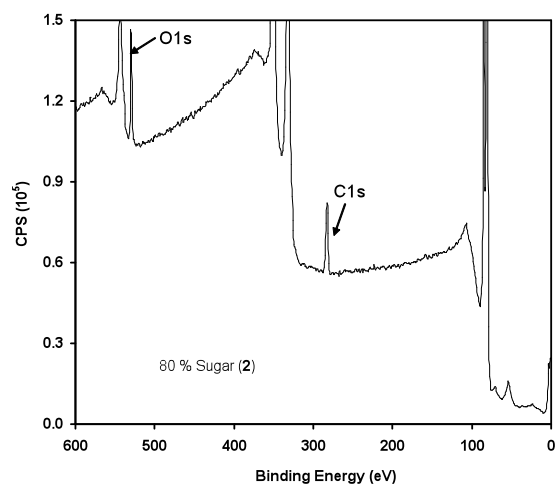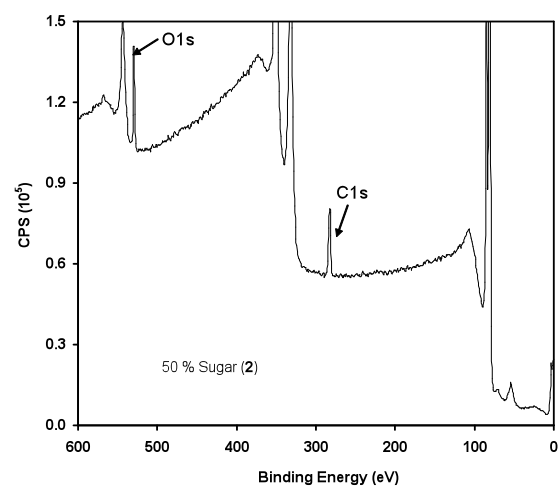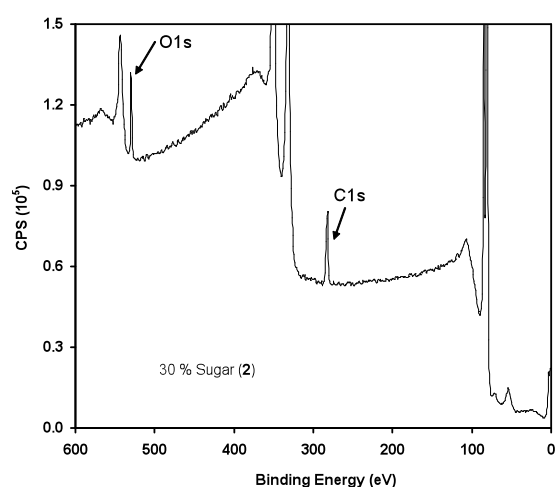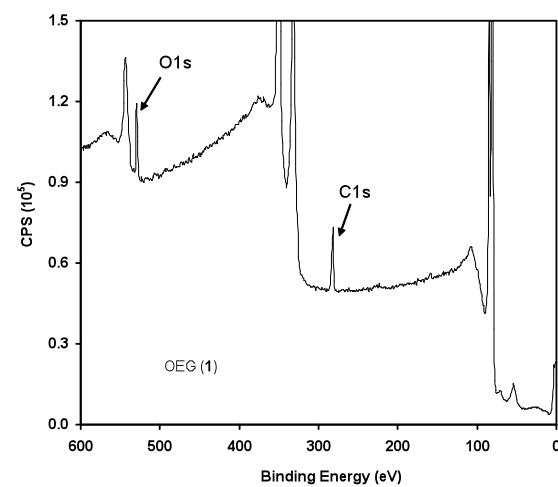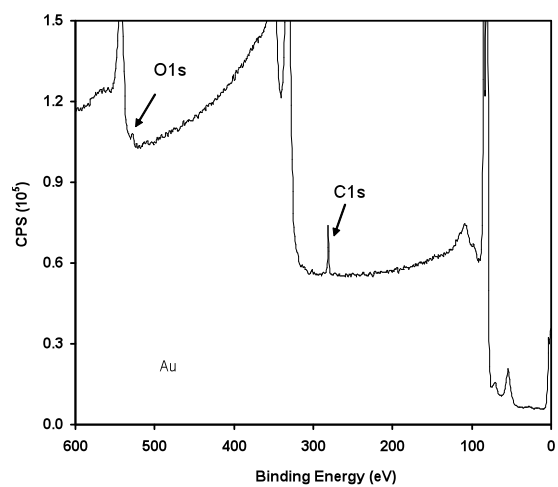

Supplement: NIHMS91563-supplement-1_si_001.pdf [file NIHMS91563-supplement-1_si_001.pdf]
